# Supplementary material for: Accurate and robust inference of microbial growth dynamics from metagenomic sequencing reveals personalized growth rates
Source: HighWire-hosted journal article supplement (doi:10.1101/gr.275533.121), 2022-01-05
Supplement: Supplemental_Tables.xlsx [file Supplemental_Tables.xlsx]

## Sheet: Supplemental Table S1
Supplementary Table S1: Pearon's correlation between log2(PTR) and supplementary experiments from Korem et al. 2015. Correlations were computed following Korem et al. 2015.
Experiment	CoPTR-Ref		CoPTR-Contig		KoremPTR		GRiD		DEMIC		iRep
	R	delay	R	delay	R	delay	R	delay	R	delay	R	delay
E. faecalis (anaerobic growth)	0.541868	30	0.579695	30	0.496265	30	0.383973	90			0.734497	30
E. faecalis (aerobic growth)	0.779283	30	0.773211	30	0.7836	30	0.77007	30			0.776489	30
L. gasseri (anaerobic growth)	0.761187	120	0.774774	120	0.794232	120	0.521123	120	0.0982691	0	0.66907	120

## Sheet: Supplemental Table S2
Supplemental Table S2: CoPTR values for samples from Long et al. 2021
log2(PTR):genome_id/sample_id	SRR9643210_1	SRR9643211_1	SRR9643212_1	SRR9643213_1	SRR9643214_1	SRR9643215_1	SRR9643216_1	SRR9643229_1	SRR9643230_1	SRR9643231_1	SRR9643232_1	SRR9643233_1	SRR9643234_1	SRR9643235_1	SRR9643246_1	SRR9643247_1	SRR9643248_1	SRR9643249_1	SRR9643250_1	SRR9643251_1
PTR_bin_1	0.390392	0.47543	0.46184	0.455221	0.573993	0.579159	0.485052
PTR_bin_10	0.921274	0.733503	0.620047	0.528975	0.591148	0.324496
PTR_bin_100								0.650362	0.855818	0.849101	0.845062			0.84428	0.739837	0.746276	0.839196	0.650923	0.602613	0.627897
PTR_bin_101	0.239736	0.365005	0.499158	0.511699	0.665578	0.651342	0.444281										0.424549		0.480741
PTR_bin_102	0.660118	0.711199	0.730406	0.697437	0.749556	0.703211	0.666939		0.835741
PTR_bin_11	0.588427	0.58905	0.521644	0.533036	0.602245	0.571795	0.539617		0.623594	0.650235	0.575217					0.624701	0.620853		0.670837
PTR_bin_12	0.515365	0.599023	0.614972	0.562562	0.534344	0.612167	0.542907
PTR_bin_13	0.470111	0.582363	0.424177	0.473088	0.663709	0.559135	0.584511
PTR_bin_14	0.39945	0.475926	0.439994	0.403528	0.439172	0.453801	0.478867	0.34089	0.412171	0.502265	0.505878	0.411629	0.304022	0.402343	0.42775	0.463187	0.46788	0.483499	0.514202	0.429753
PTR_bin_15	0.544353	0.601293	0.513703	0.51779	0.700242	0.658319	0.683483
PTR_bin_16		0.377707	0.483479	0.410261	0.543995	0.577485	0.547545										0.401839		0.433593	0.362828
PTR_bin_17					0.741329	0.718486	0.726357											0.491079	0.502042	0.572035
PTR_bin_18	0.413601	0.376948	0.377043	0.396429	0.584922	0.562238	0.497091		0.451289	0.408644	0.448405			0.316216	0.434447	0.508566	0.320527		0.383451
PTR_bin_2	0.933181	1.0554	0.835377	0.859482	1.05648	1.00508	1.16095		1.38439	1.18438	1.18668			1.39431					1.05927
PTR_bin_20	0.470029	0.409366	0.668664	0.58085	0.549217
PTR_bin_21									0.660706	0.69468	0.66413	0.111011	0.101212	0.20241
PTR_bin_22	3.70125	3.90993	3.69183	3.581	3.77484	3.36922	2.98749	0.843619	3.29453	3.06436	3.15495	2.55608		3.66094		1.90273			1.99303
PTR_bin_23	0.347015	0.340335	0.514023	0.514182	0.5654	0.555465
PTR_bin_24								0.637236								0.618524	0.575232	0.68714	0.620543	0.506593
PTR_bin_25								0.986496	1.05005	1.07938	1.0362	0.989292	0.910355	1.00384	1.01069	1.0268	1.05748	1.00002	1.01106	0.915121
PTR_bin_26	0.562874	0.585475	0.620281		0.760758	0.669183	0.694978	0.648526	0.593899	0.741427	0.487929				0.62805	0.703873	0.673773	0.541103	0.634813	0.605777
PTR_bin_27									0.994545	1.09396	0.844662	0.849741	0.916943	0.676485
PTR_bin_28	0.983142	1.09731	1.08459	1.05819	1.18822	1.04112	1.03269	0.509567	0.429432	0.408107	0.437828	0.399478		0.323687	0.348246	0.391317	0.433313		0.482383
PTR_bin_3	1.5909	1.73576	1.53427	1.40465	1.77778	1.85278	1.1903
PTR_bin_30	0.541543	0.543205	0.542603	0.546607	0.614977	0.562521	0.606236	0.488315	0.53099	0.637362	0.545771	0.549534	0.503294	0.575301	0.454607	0.444395	0.513714	0.445059	0.514321	0.497198
PTR_bin_32	0.48935	0.49131	0.553189	0.570937	0.78544	0.559034
PTR_bin_33	0.563759	0.737425	0.777822		0.628128	0.586265
PTR_bin_34	0.346513	0.395637	0.401115	0.429317	0.443346						0.763171			0.502827
PTR_bin_35					0.767592		0.833737	0.709209			0.682987				0.742515	0.76036	0.890187	0.763992	0.82418	0.676071
PTR_bin_36	0.547066	0.477739	0.590988	0.413197	0.633297
PTR_bin_37	0.432576	0.431992	0.415759	0.419259	0.644922		0.563002
PTR_bin_38	0.422003	0.465382	0.403108	0.406994	0.5783	0.488692	0.503426
PTR_bin_39	0.41073	0.639747	0.537687	0.44097	0.688648	0.6123	0.613596												0.50072
PTR_bin_4	1.57857	1.5527	1.56787	1.52074	1.58744	1.53638	1.5835	1.42193	1.53478	1.48342	1.51229	1.39214		1.57324	1.46611	1.42224	1.43872	1.42801	1.45645	1.41042
PTR_bin_42					0.926568	0.799278	1.02585	0.511641	0.60874	0.555038	0.48227				0.58199	0.518057	0.635675	0.615588	0.608302	0.498329
PTR_bin_44	0.705861	0.732212	0.737027	0.664168	0.584845	0.558235
PTR_bin_45	1.0011	1.00702	0.977165	0.967742	1.00723	0.965017	0.992541		0.921088
PTR_bin_46	0.458333	0.427381	0.520855	0.547552	0.607274	0.664724
PTR_bin_47					0.773825	0.742326	0.700119	0.548857	0.705984	0.705643	0.743532				0.664961	0.76528	0.582009	0.498141	0.508683
PTR_bin_49	0.353457	0.367277	0.447858	0.456418	0.613891	0.609574	0.60234
PTR_bin_5	0.340808	0.389725	0.47633	0.441038	0.45326	0.658557			0.0855772	0.183708	0.225589	0.150045	0.0587121	0.126947
PTR_bin_50									0.606934	0.558151	0.57104					0.582282	0.670708	0.435826	0.469451
PTR_bin_51	0.545687	0.545877	0.572294	0.609587	0.618325	0.616074	0.611494		0.53649	0.611566	0.615993			0.625135
PTR_bin_53	0.517147	0.649236	0.593821	0.534013	0.687437	0.66817	0.632331
PTR_bin_54		0.515939			0.556431	0.588382	0.629984	0.430172	0.409455	0.507062	0.406658				0.416326	0.457775	0.526801	0.459936	0.455729	0.447668
PTR_bin_57	0.551217	0.746222	0.524379	0.497484	0.777586	0.629688	0.78775	0.340493	0.573255	0.534742	0.624874				0.350124	0.461437	0.609448	0.355325	0.412768	0.374127
PTR_bin_59	0.416895	0.462404	0.519347	0.415358	0.699482	0.742134	0.633962
PTR_bin_6	0.505397	0.490897	0.470598	0.473511	0.67631	0.537126	0.670161	0.276835	0.529903	0.510135	0.397676			0.516091					0.248466	0.419412
PTR_bin_63								0.64866							0.668626	0.679872	0.58566		0.679547	0.714543
PTR_bin_64								0.407912	0.535963						0.418961	0.494161	0.551983	0.523834	0.486616	0.392722
PTR_bin_65	0.43641	0.48741	0.454647	0.5876	0.558431	0.516996	0.337243	0.278876	0.524606	0.45835	0.395604	0.555357	0.498932	0.434949	0.505301	0.474714	0.431907	0.346624	0.396942	0.423353
PTR_bin_66	0.574431	0.774192	0.51951	0.738999	0.791235	0.724483	0.875294	0.528055	0.734748	0.760155	0.757271	0.541031	0.610855	0.791065	0.613075	0.64119	0.790858	0.492281	0.474784	0.457965
PTR_bin_68								0.566177	0.678411	0.633515	0.579376				0.576954	0.609591	0.639613	0.605302	0.680787	0.706172
PTR_bin_7	0.840242	0.845171	0.917494	0.920758	0.920738	0.889459	0.839163	1.14456	1.23962	1.23104	1.2381	1.18289	1.17404	1.2474	1.18143	1.11271	1.08881	1.01726	1.08997	1.13667
PTR_bin_70	0.461334	0.530065	0.50672	0.499485	0.476823
PTR_bin_72	0.575602	0.597664	0.607445	0.56844	0.649802	0.643346	0.6254
PTR_bin_74	0.635925	0.609547	0.553967	0.531192	0.684316
PTR_bin_75	0.418827	0.442042	0.373541	0.412053	0.514608				0.472985	0.478206	0.464927	0.477953		0.528928
PTR_bin_76	0.469438	0.499278	0.51433	0.477202	0.548135	0.506346	0.53407	0.371602	0.498146						0.366332	0.484	0.535538	0.359675	0.439637	0.345141
PTR_bin_77	0.422895	0.52647	0.493658	0.469731	0.728039	0.677675	0.639234	0.386841	0.503578	0.563641	0.701488			0.474569	0.490689	0.457576	0.754202	0.470563	0.706224	0.535655
PTR_bin_79	0.569117	0.575792	0.589495	0.563984	0.592163				0.537298	0.526956	0.530079	0.240255	0.216744	0.276118
PTR_bin_8	1.8053	1.88329	1.77676	1.75151	1.92349	1.83091	1.72538	1.2548	1.7265	1.73082	1.74877	1.47233	1.38654	1.85213	1.3667	1.31547	1.39077	1.29587	1.42902	1.45013
PTR_bin_80	0.479835	0.520409	0.442771	0.473865	0.535354	0.48209	0.579847
PTR_bin_85	0.329591	0.348178	0.374476	0.137801	0.613665	0.506329	0.55824	0.273302	0.379759	0.555603	0.375352				0.32094	0.428104	0.334236	0.385486	0.31602	0.36201
PTR_bin_86								0.999342							1.0239	1.16484	1.2788	1.04627	1.07397	1.00954
PTR_bin_88	0.798044	0.842199	0.842047	0.782679	0.74355	0.863277		0.713488	0.78469	0.777341	0.769117	0.761388	0.759882	0.787918	0.789133	0.782988	0.726974	0.770437	0.739965	0.77078
PTR_bin_9	0.502845	0.537103	0.583009	0.526284	0.596597	0.539104	0.56713	0.402211	0.513884	0.489246	0.562456	0.501191	0.446171	0.506103	0.523899	0.486513	0.494164	0.461401	0.554643	0.468015
PTR_bin_90	0.494707	0.510686	0.544367	0.583005	0.592096	0.617051	0.578611		0.676023	0.611514
PTR_bin_91	0.901889	0.919853	0.905165	0.898873	0.886104	0.803938	0.807422
PTR_bin_92	0.44525	0.556905	0.561157	0.546649	0.662774	0.874798			0.753733	0.75491	0.691406	0.609716	0.532898	0.587577
PTR_bin_93	0.530844	0.568036	0.48222	0.49501	0.654248	0.629003	0.811222
PTR_bin_95	0.398062	0.469288	0.386127	0.291013	0.722987	0.616977	0.733266									0.552165	0.661989		0.521585	0.690648
PTR_bin_96	0.442082	0.535716	0.463357	0.407174	0.568374	0.568363	0.616355												0.400494
PTR_bin_97	0.516424	0.577786	0.515444	0.54471	0.654503	0.633636	0.651294

## Sheet: Supplemental Table S3
Supplemental Table S3: Effect sizes and p-values from the antibiotic resistance experiment.
Parameter	Effect Size	p-value
Erythromycin	−0.3412	0.0014
Nalidixic acid	0.2819	0.000399
a_treatment	-0.0629	0.00167
b_treatment	1.5183	8.08e-34
a_recovery	−0.1939	0.938
b_recovery	1.1945	2.51e-23
a_stationary	−0.0902	0.146
b_stationary	0.6591	1.78e-12

## Sheet: Supplemental Table S4
Supplemental Table S4: Top 5 most significantly associated PTRs with Crohn’s disease.Total of 120 hypothesis tests were performed. Number of cases and controls refer to individuals, not total samples.
Species	Effect Size	p-value	q-value	# Cases	# Controls
Subdoligranulum sp.	-0.15735	0.00021	0.025177	29	20
COE1 sp.	0.114031	0.00104	0.062412	11	12
Dorea longicatena	0.176232	0.003077	0.123098	58	25
Flavonifractor plautii	0.050461	0.007306	0.202415	47	22
ER4 sp.	-0.0512	0.009973	0.202415	14	15

## Sheet: Supplemental Table S5
Supplemental Table S5: Top 5 most significantly associated PTRs with Ulcerative Colitis. Total of 102 hypothesis tests were performed. Number of cases and controls refer to individuals, not total samples.
Species	Effect Size	p-value	q-value	# Cases	# Controls
Roseburia intestinalis	0.094214	1e-05	0.001068	27	23
Ruminiclostridium sp.	-0.138431	0.000505	0.02575	12	18
Subdoligranulum sp.	-0.168006	0.000792	0.026915	19	20
Faecalibacterium HGM13285	0.742445	0.003055	0.077897	27	24
Flavonifractor plautii	0.052042	0.012679	0.258653	27	22

## Sheet: Supplemental Table S6
Supplemental Table S6: Top 5 most significantly associated relative abundances with R. intestinalis. Total of 127 hypothesis tests were performed.
Species	Effect Size	p-value	q-value	Sample Size
Oscillibacter sp KLE 1745	-1.63224	3e-06	0.000342	45
Actinobacillus unclassified	63.8913	0.000262	0.016633	57
Peptostreptococcaceae noname unclassified	10.1379	0.000908	0.038427	288
Haemophilus parainfluenzae	0.861744	0.010901	0.298997	386
Alistipes onderdonkii	-0.628384	0.011772	0.298997	331

## Sheet: Supplemental Table S7
Supplemental Table S7: Top 5 most significantly associated metabolites with R. intestinalis. Total of 443 hypothesis tests were performed.
Metabolite	HMDB Accession	Effect Size	p-value	q-value	Sample Size
2-hydroxyglutarate	HMDB59655	0.028988	0.000194	0.042292	185
13-cis-retinoic acid	HMDB06219	0.010219	0.000195	0.042292	131
malonate	HMDB00691	0.008374	0.00199	0.280461	166
C36:0 DAG	HMDB07158	-0.009536	0.002591	0.280461	118
C20:4 LPE	HMDB11517	0.033313	0.003635	0.282199	185

## Sheet: Supplemental Table S8
Supplemental Table S8: Accession numbers and identifiers of genomes and datasets used.
Description	Download Source	Identifier
E. coli genomes	NCBI RefSeq	NC_002695.2, NC_004431.1, NC_007779.1, NC_010468.1, NC_010498.1
E. coli assembly	NCBI RefSeq	NZ_JAGGIP010000010.1
L. gasseri genomes	NCBI RefSeq	NC008530.1, NZCP006803.1, NZCP021427.1, NZCP054875.1
E. faecalis genomes	NCBI RefSeq	NC004668.1, NC018221.1, NZCP008816.1, NZCP018004.1, NZCP018102.1
E. faecalis assembly	PATRIC	1351.43
E. coli MAGs	IGGdb	ERS23551765, ERS23555422, ERS23555817, ERS23556748, ERS2355805, ERS23559141, ERS23559293, ERS23559334, ERS2355943, ERS23559831
L. gasseri MAGs	IGGdb	ERS39647142, ERS47303924, ERS4730537, ERS4733842, ERS60847613, ERS60850643, SRS17191335, SRS17354372, SRS25510217, SRS2949944
E. coli genomic dataset	NCBI SRA	ERR969279-ERR969334
E. coli metagenomic dataset	NCBI SRA	SRR1952457, SRR1952459, SRR1952575, SRR1952582, SRR1952598, SRR1952613, SRR1952621, SRR2077403, SRR2175645, SRR2175647, SRR2175654, SRR2175658, SRR2175659, SRR2175725, SRR2175726, SRR2175755, SRR2175766, SRR2175767, SRR2175777, SRR2175780, SRR2175792, SRR2240290, SRR2240728, SRR2241023, SRR2241109, SRR2241118
L. gasseri genomic dataset	NCBI SRA	ERR969426-ERR969438, ERR969440-ERR969450
L. gasseri vaginal metagenomic dataset	NCBI SRA	SRR059392, SRR059393, SRR059473, SRR063749, SRR1804974, SRR2175824, SRR2241374, SRR513144, SRR513147, SRR514852, SRR628270
L. gasseri gut metagenomic dataset	NCBI SRA	SRR5935920, SRR5936055, SRR5936136, SRR5936140, SRR5946677, SRR5946785, SRR5946864, SRR5946962, SRR5947082, SRR5950499, SRR5950538, SRR5950556, SRR5950631
Long et al. benchmark	NCBI SRA	BioProject PRJNA551656
IDB Dataset	NCBI SRA	BioProject PRJNA398089
